# Supplementary material for: Demonstration of transgressive overyielding of algal mixed cultures in microdroplets
Source: Royal Society of Chemistry journal article supplement (doi:10.1039/c6ib00241b), 2017-01-01
Supplement: c6ib00241b1.zip [file c6ib00241b1.zip]

**Supplementary Information 2:** Droplet uniformity throughout algal growth cycle

**
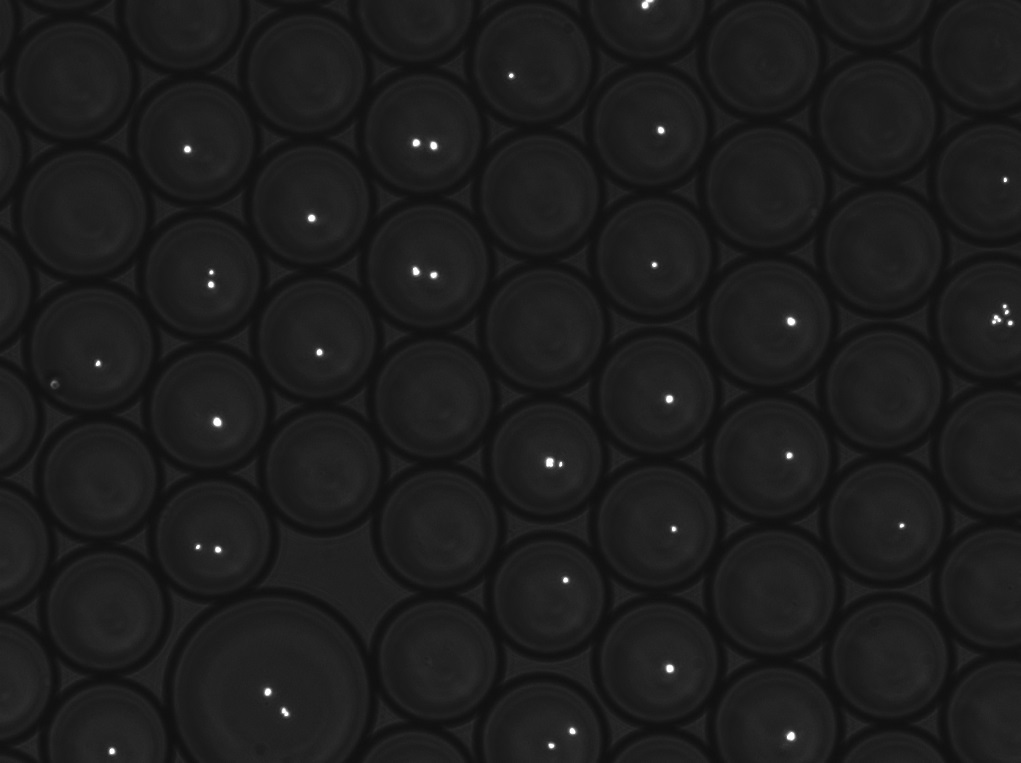
**

100

**Supplementary Figure 1:** *Chlorella Sorokiniana* monoculture, day 0


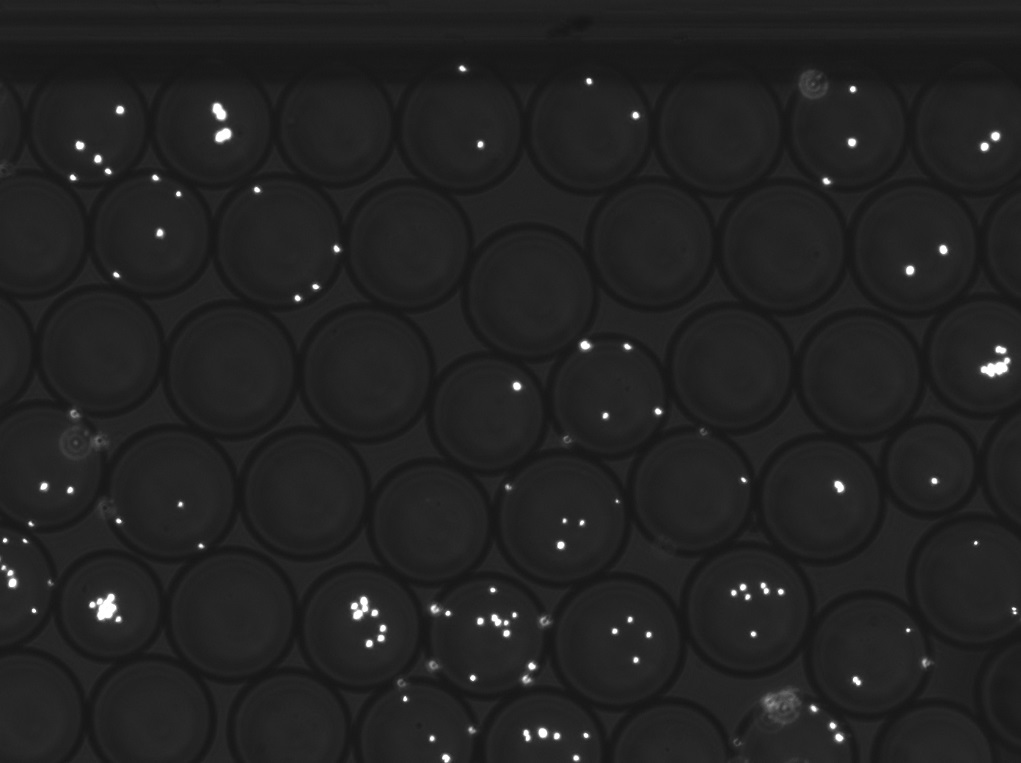


100

**Supplementary Figure 2:** *Chlorella Sorokiniana* monoculture, day 5


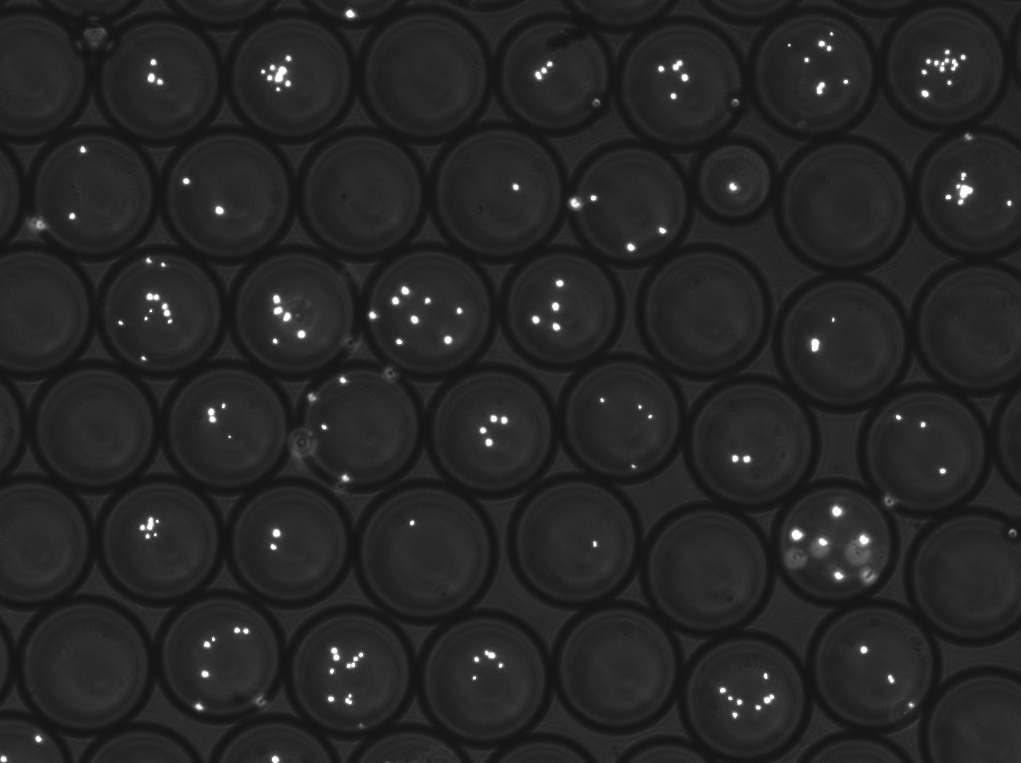


100

**Supplementary Figure 3:** *Chlorella Sorokiniana* monoculture, day 10


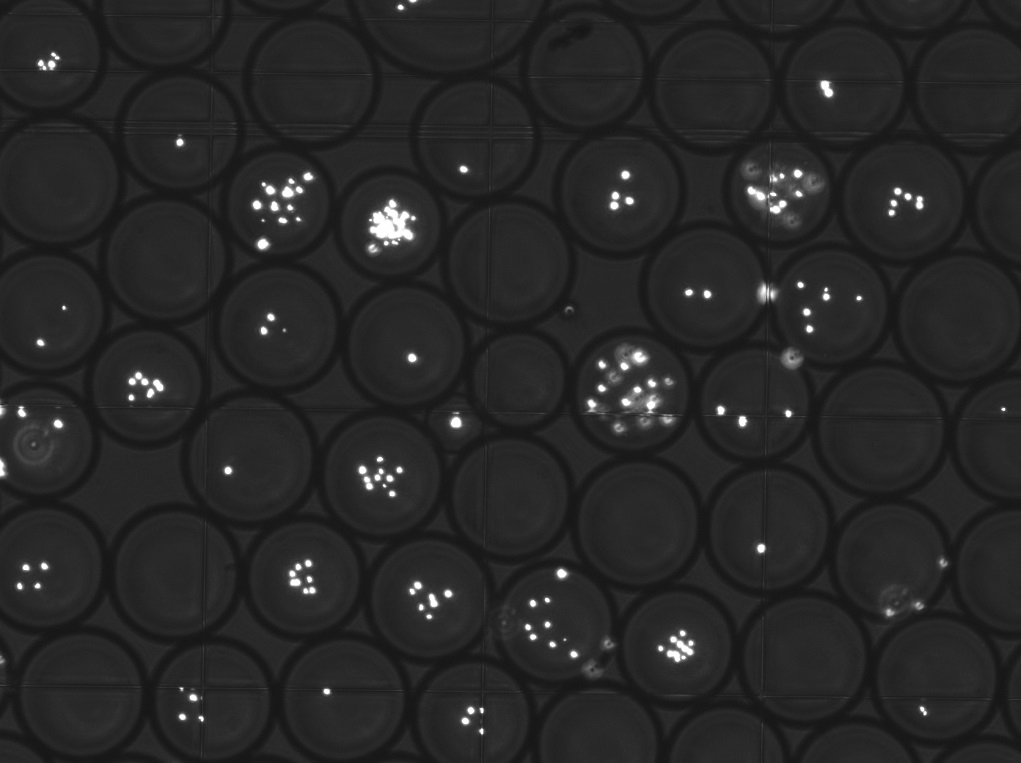


100

**Supplementary Figure 4:** *Chlorella Sorokiniana* monoculture, day 15
